# Supplementary material for: SETD2 transcriptional control of ATG14L/S isoforms regulates autophagosome–lysosome fusion
Source: PubMed Central journal article supplement (PMC9653477; doi:10.1038/s41419-022-05381-9), 2022-11-12

Figure 1a

Atg8

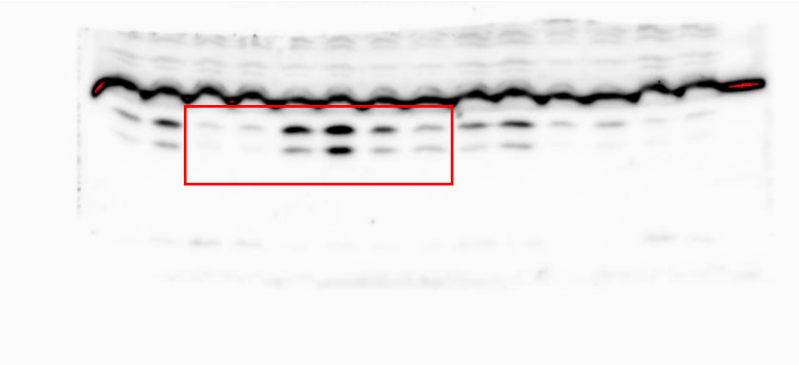

Pgk1

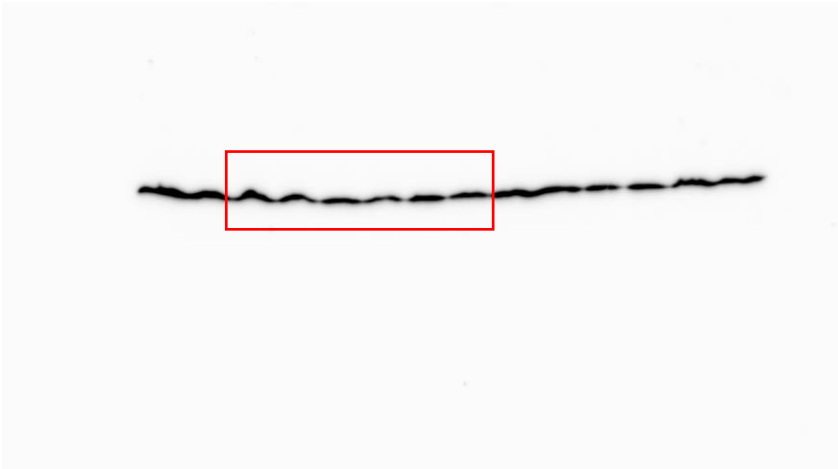

Figure 1c

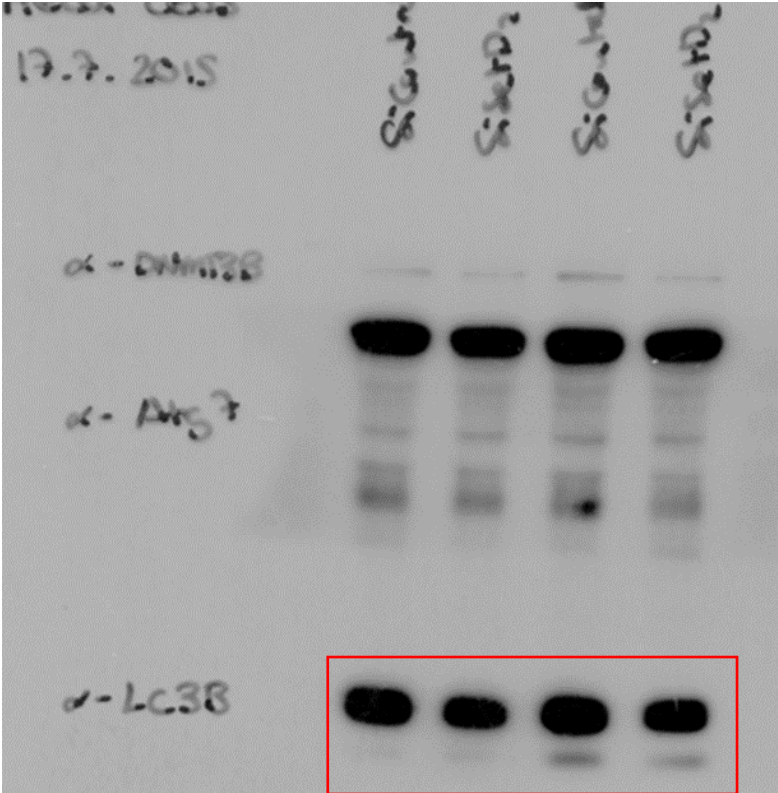

reincubation

ACTB

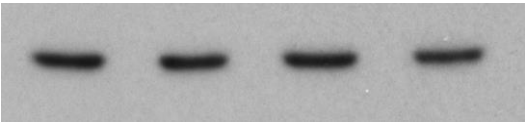

Figure 1f

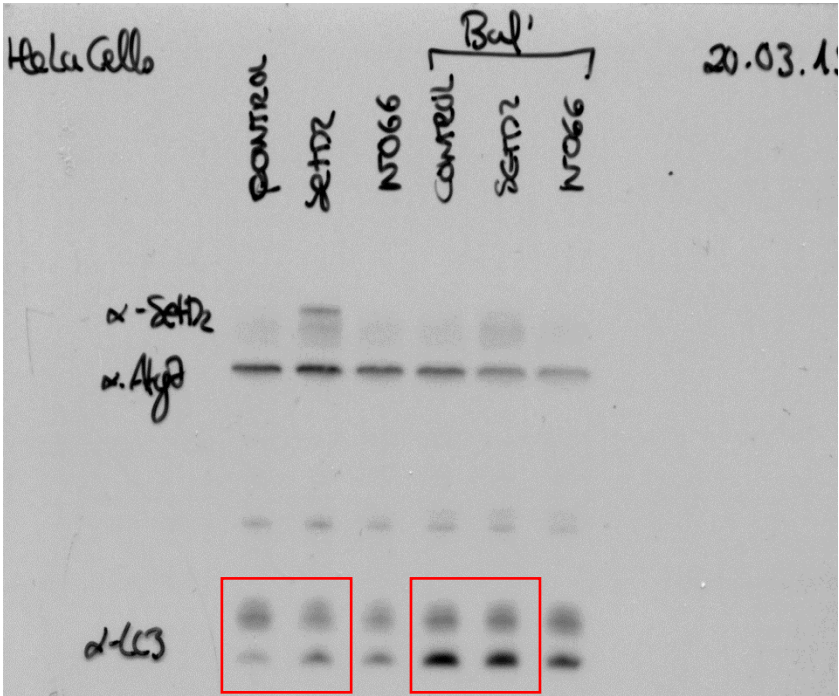

reincubation

actin

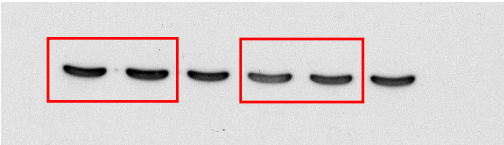

Figure 4a

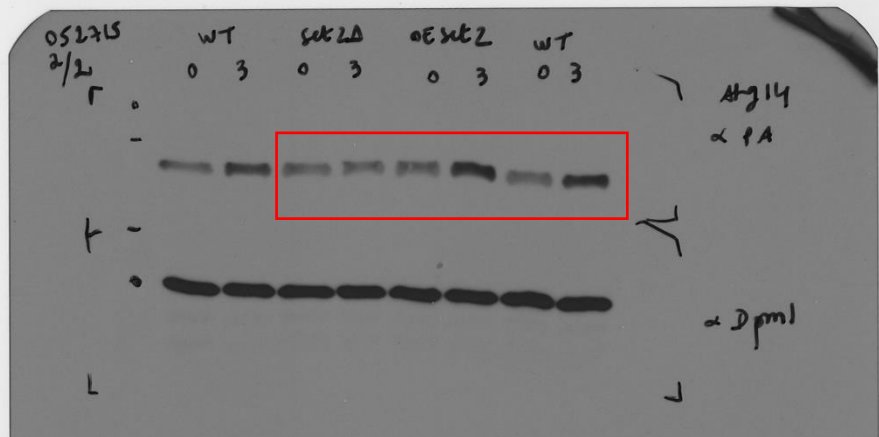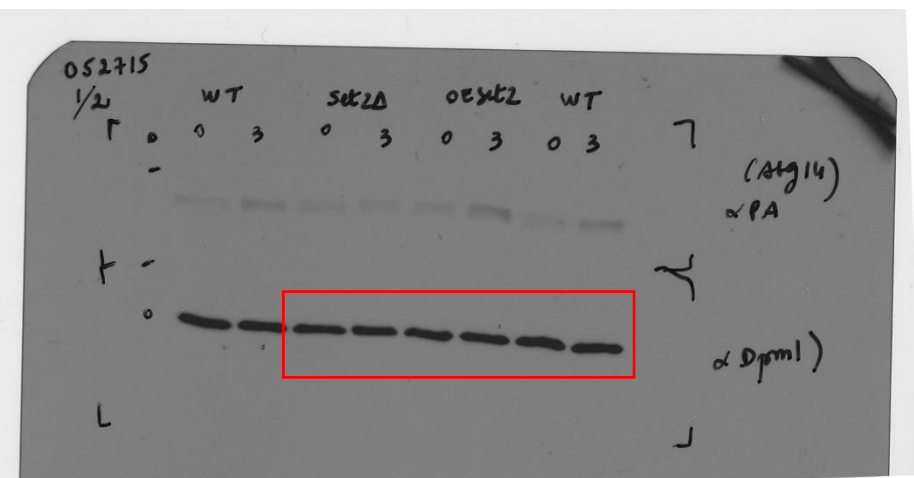

Figure 4c

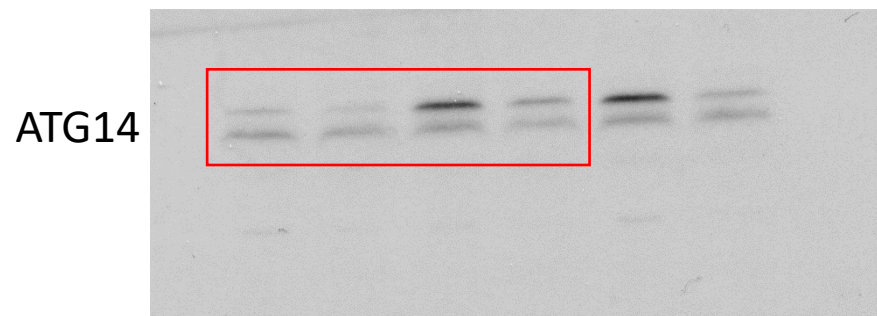

↓ reincubation

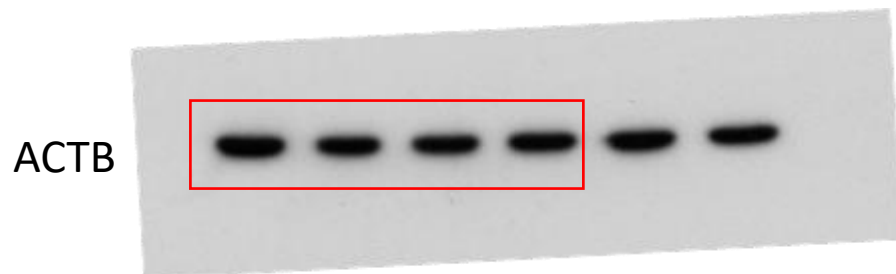

**Figure 6c**

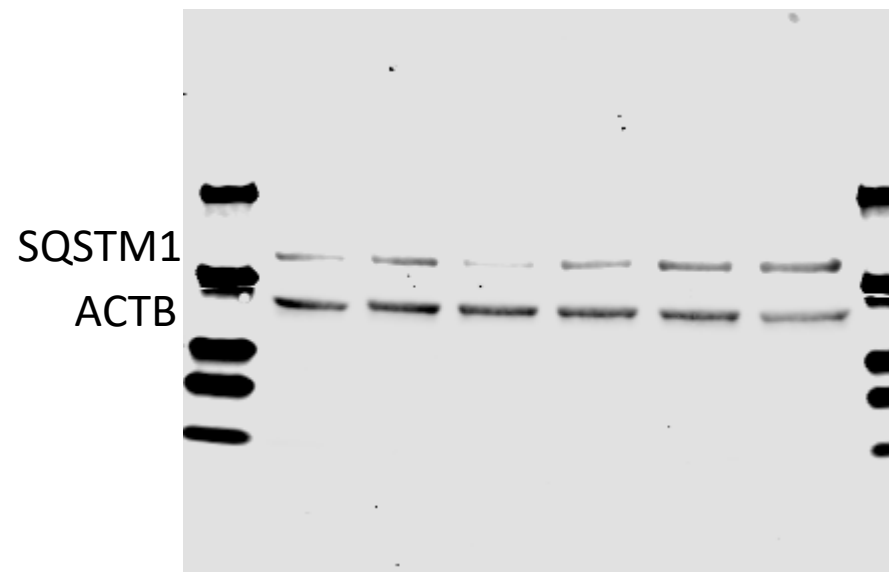

**Figure 6f**

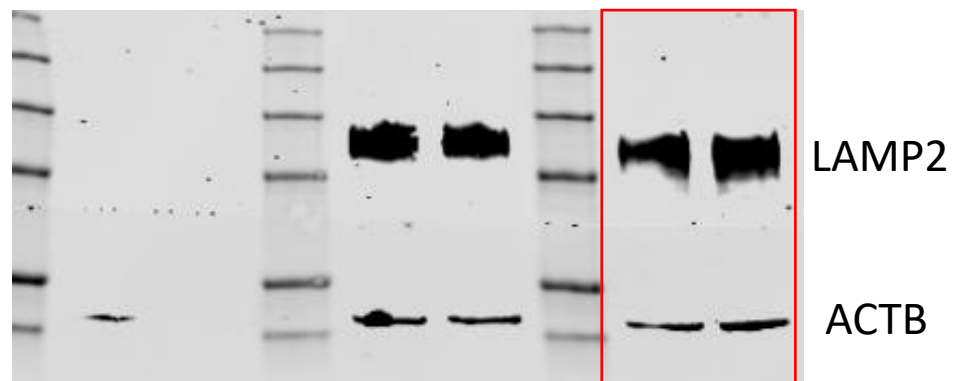

**Figure 7c**

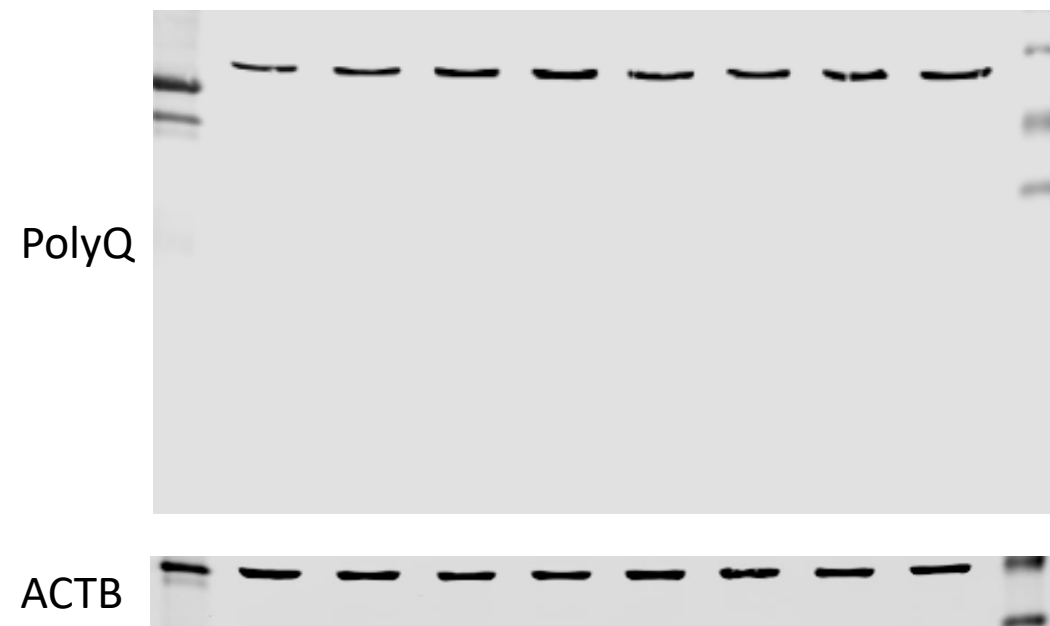

Supplementary figure S1b

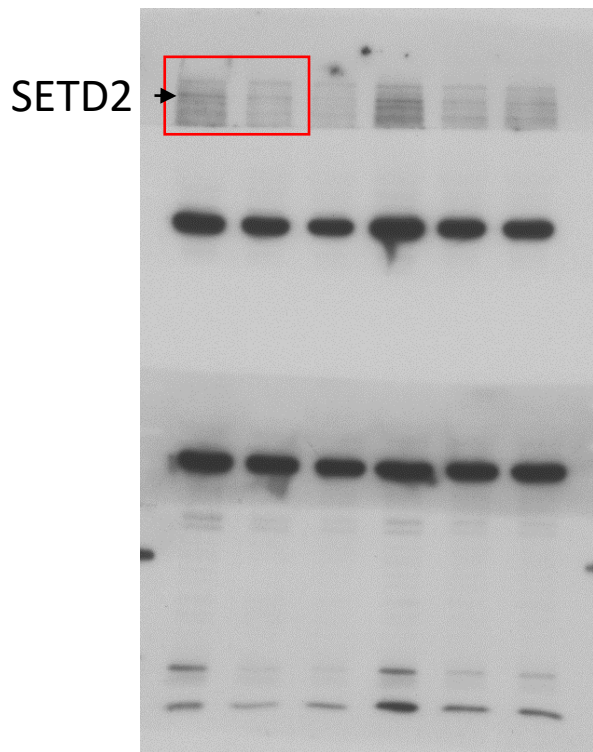

Supplementary figure S1d

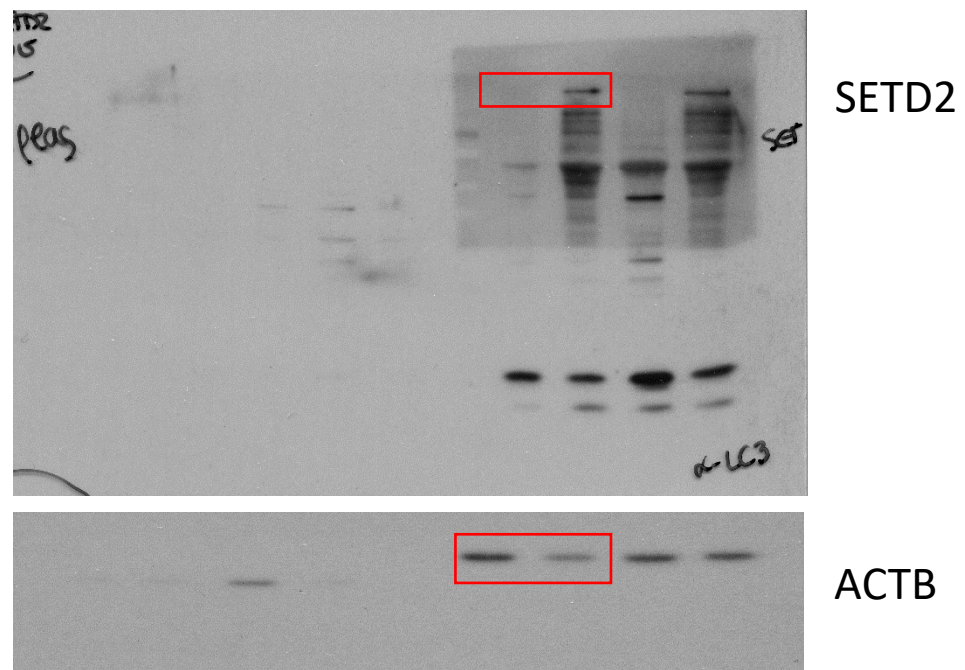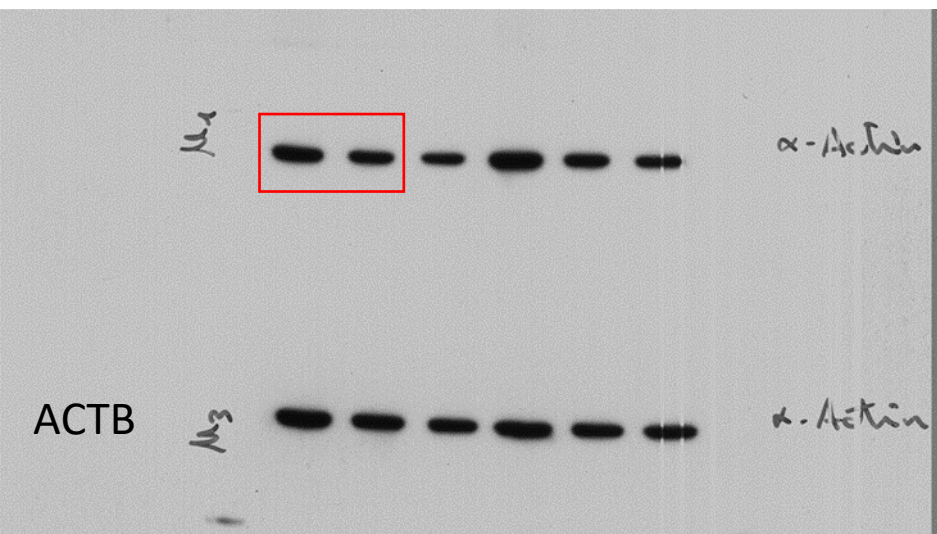

Supplementary figure S3a

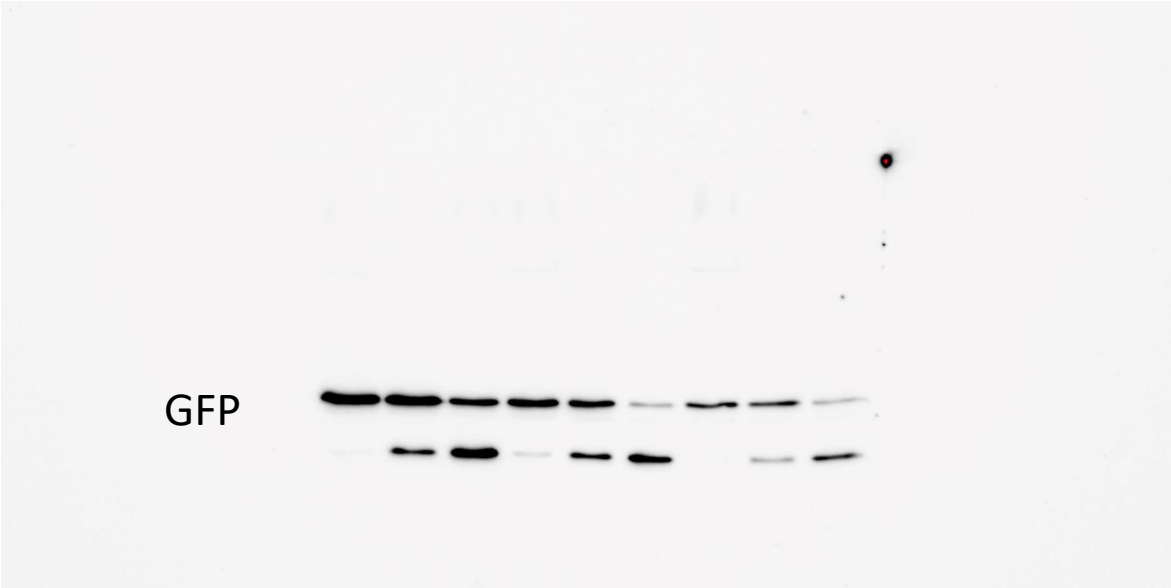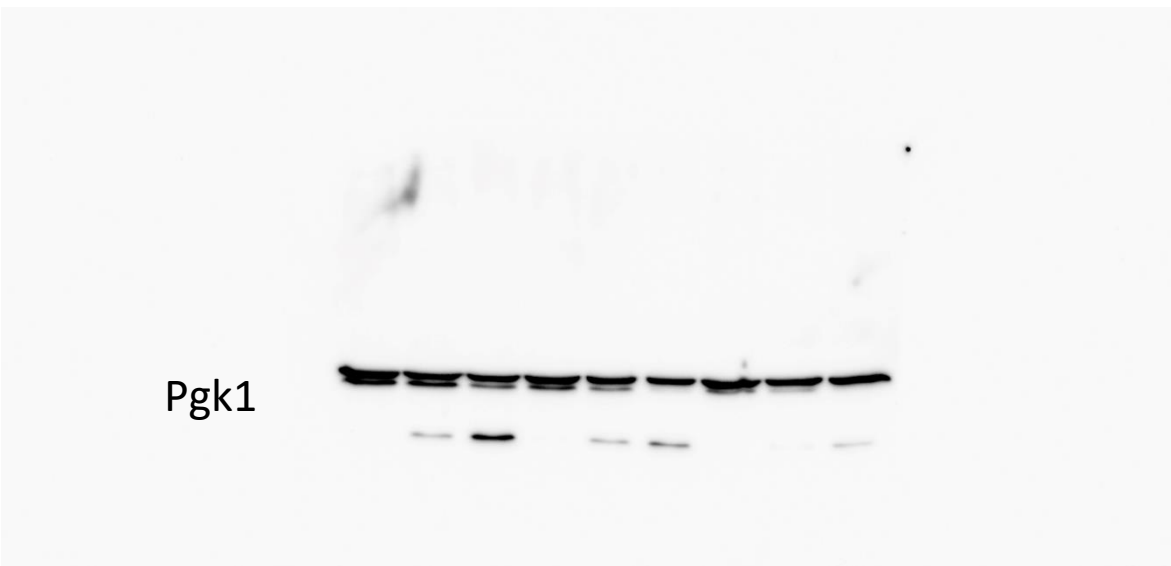

Supplement: 41419_2022_5381_MOESM3_ESM.pdf [file 41419_2022_5381_MOESM3_ESM.pdf]
