# Supplementary material for: SETD2 transcriptional control of ATG14L/S isoforms regulates autophagosome–lysosome fusion
Source: PubMed Central journal article supplement (PMC9653477; doi:10.1038/s41419-022-05381-9), 2022-11-12
Supplement: 41419_2022_5381_MOESM2_ESM.pdf [file 41419_2022_5381_MOESM2_ESM.pdf]

**Ensembl Gene: ATG14 ENSG00000126775**

Chromosome 14: 55,366,366,391-55,411,830 reverse strand

ATG14-201 - ENST0000247178 with 10 exons encoding for ATG14L

ATG14-202 - ENST0000558189 with 7 exons encoding for ATG14S

[Translated sequence](#) / [Flanking sequence](#) / [intron sequence](#) / [UTR](#)

**ATG** transcription start site for *ATG14L* in exon 1 and *ATG14S* in alternative exon 4' are indicated.

| Exon / Intron                            | Length | Sequence                                                                                                                                                                                                                                                                                                                                                                                                                                |
|------------------------------------------|--------|-----------------------------------------------------------------------------------------------------------------------------------------------------------------------------------------------------------------------------------------------------------------------------------------------------------------------------------------------------------------------------------------------------------------------------------------|
| 5' upstream sequence                     |        | .....cagaatgcaccggttgaaaacaaaatcccacgtgactggctctcctctc                                                                                                                                                                                                                                                                                                                                                                                  |
| <b>Exon 1</b><br>with ATG14L start site  | 229    | AGGCCATC <b>ATG</b> GCGTCTCCAGTGGGAAGGGAGCCCGGGCGCTGGAGGCTCCTGGCTGCG<br>GGCCCCGGCCGCTCGCCCGGGACCTGGTGGACTCCGTGGACGATGCGGAGGGGCTGTACG<br>TGGCTGTGGAGCGCTGCCCGCTGTGCAACACTACCCGCCGGCGGCTGACCTGCCCAAAT<br>GCGTTCAGAGCGCGATTTTCGTCTACTTCGACGCCGCGACCGGGAGAG                                                                                                                                                                                 |
| Intron 1-2                               | 14,167 | gtacggcgccgcccacggccctatt.....aagacattgaatTTTTTTgttacag                                                                                                                                                                                                                                                                                                                                                                                 |
| <b>Exon 2</b>                            | 63     | GTTTATCGACAAGAAGGAAAGGTTAAGCCGACTTAAGAGCAAGCAAGAAGAATTCAGAA<br>AGA                                                                                                                                                                                                                                                                                                                                                                      |
| Intron 2-3                               | 1,389  | gtgagtgttttgttttgtcttttaa.....tattttctgtctcttttctcacag                                                                                                                                                                                                                                                                                                                                                                                  |
| <b>Exon 3</b>                            | 43     | AGTGTTAAAAGCTATGGAAGGAAAATGGATAACAGATCAGTTG                                                                                                                                                                                                                                                                                                                                                                                             |
| Intron 3-4                               | 4,947  | gtaagttgtaatacatgttcttttt.....gatatttattacatgcttttttcag                                                                                                                                                                                                                                                                                                                                                                                 |
| 5' upstream sequence                     |        | .....aggcatgcgccaccacgccagctaattTTTTgtattTTTTtagtagagat                                                                                                                                                                                                                                                                                                                                                                                 |
| <b>Exon 4'</b><br>with ATG14S start site |        | GGGGTTTCACCATGTTGGCCAGGATGGTCTTGATCTCCTAACCTCTTGATCTGCCCTCCT<br>TGGCCTCCCAAAGTGCTGCGATTACAGGCGTGAGCCACCGCACTGGCCTAATTTCTCTTT<br>TCTCTGCATTGAACTAGAAAAACATCGTTCTCTTTTTTCGTAATGTTCCATAGTTACAAAA<br>GCTATAACATAAGGTCTTTTTCTTCATTATGTTTTCTGCATATCTGAAAATAAGCAGTG<br>ATCCCAGGTAGATAATCATATTAACCATAAGAGACCAACGTTTGTGATATTTATTACATG<br>CTTTTTTCAGAGATGGAAAATA <b>ATG</b> TCCTGCAAGATGAGGATTGAACAGTTAAAACAAAC<br>AATATGTAAGGAAATGAAGAAATGGAGAAA |
| <b>Exon 4</b>                            | 82     | AGATGGAAAATAATGTCTGCAAGATGAGGATTGAACAGTTAAAACAAACAATATGTAAA<br>GGAAATGAAGAAATGGAGAAA                                                                                                                                                                                                                                                                                                                                                    |
| Intron 4-5                               | 4,814  | gtaagtaattcgtgtccttccctcc.....gttgggtgtgatttatttatttttag                                                                                                                                                                                                                                                                                                                                                                                |
| <b>Exon 5</b>                            | 238    | ATTCTGAAGCCTTCTCAAACCAAGGAAAAGAATCAGAAGCTTTACAGTCGAGCACAAAC<br>GGCACCAAGGAAAAAGGAGAAGATTCAGAGGCATAATCGCAAACCTGGTGACCTGGTAG<br>AAAAAAGACCATTGACTTAAGAAGTCATTATGAGCGTCTGGCAAATCTTCGACGATCCC<br>ATATATTAGAGCTCACCTCTGTCAATTTTCCAATCGAGGAAGTAAAGACGGGTGTGAG                                                                                                                                                                                 |
| Intron 5-6                               | 3,667  | gtacattaagcaagtcttttgactc.....tccgtgtgtgtcttctactttag                                                                                                                                                                                                                                                                                                                                                                                   |
| <b>Exon 6</b>                            | 230    | AGACCCCGCAGATGTGTCTTCAGAGAGTGACAGTGCCATGACCTCCAGCACTGTGAGCAA<br>GCTTGCTGAAGCCCGGAGGACAACCTTACCTCTCAGGACGATGGGTCTGTGACGATCACAA<br>CGGAGACACCAGCATTAGCATTACAGGGCCTGGATTAGCCTCCCTAACAAATGGGGACTA<br>CTCTGCCTACTACAGCTGGGTGGAGGAGAAGAAAACAACCCAGGGGCCTG                                                                                                                                                                                     |
| Intron 6-7                               | 1,271  | gtgagaagcagcatatcctttgaaa.....catgggtgggtgttttcttactgcag                                                                                                                                                                                                                                                                                                                                                                                |
| <b>Exon 7</b>                            | 118    | ACATGGAGCAGAGTAACCCTGCCTACCCATCAGTGTGCGCTGTGCTATGCAACTCAGC<br>TGGTCAACATCTGTCTCATATACTTGATGTAATCTTCCCAAAAAGCTCTGCAACAG                                                                                                                                                                                                                                                                                                                  |
| Intron 7-8                               | 2,498  | gcaagtaattgaaggtggtaatgtc.....tataaattgtatgtttgttttacag                                                                                                                                                                                                                                                                                                                                                                                 |
| <b>Exon 8</b>                            | 91     | TGAATTTTGTGGCGAAAATCTAAGCAAGCAGAAATTTACTCGAGCAGTGAAGAACTGAA<br>TGCAAATATTCTTTACCTTTGTTTTTCTCAG                                                                                                                                                                                                                                                                                                                                          |
| Intron 8-9                               | 79     | gtatgaaaaataggttgtgaactaa.....taaccaattctttaatTTTTTTtag                                                                                                                                                                                                                                                                                                                                                                                 |
| <b>Exon 9</b>                            | 86     | CATGTAATTTAGATCAATTACAACCACTGCATACCCCTCAGGAATCTAATGTACCTGGTC<br>AGTCCAAGCTCTGAACACCTAGGCAG                                                                                                                                                                                                                                                                                                                                              |

| Exon / Intron          | Length | Sequence                                                                                                                                                                                                                                                                                                                                                                                                                                                                                                                                                                                                                                                                                                                                                                                                                                                                                                                                                                                                                                                                                                                                                                                                                                                                                                                                                                                                                                                                                                                                                                                                                                                                                                                                                                                                                                                                                                                                                                                                                                                                                                                                                                                                                                                                                                                                                                                                                                                                                                                                                                                                                                                                                                                                                                                                                                                                                                                                                                                                                                                                                                                                                                                                                                                                                                                                                                                                                                                                                                                                                                                                                                                                                                                                                                                                                                                                                                                                                                                             |
|------------------------|--------|------------------------------------------------------------------------------------------------------------------------------------------------------------------------------------------------------------------------------------------------------------------------------------------------------------------------------------------------------------------------------------------------------------------------------------------------------------------------------------------------------------------------------------------------------------------------------------------------------------------------------------------------------------------------------------------------------------------------------------------------------------------------------------------------------------------------------------------------------------------------------------------------------------------------------------------------------------------------------------------------------------------------------------------------------------------------------------------------------------------------------------------------------------------------------------------------------------------------------------------------------------------------------------------------------------------------------------------------------------------------------------------------------------------------------------------------------------------------------------------------------------------------------------------------------------------------------------------------------------------------------------------------------------------------------------------------------------------------------------------------------------------------------------------------------------------------------------------------------------------------------------------------------------------------------------------------------------------------------------------------------------------------------------------------------------------------------------------------------------------------------------------------------------------------------------------------------------------------------------------------------------------------------------------------------------------------------------------------------------------------------------------------------------------------------------------------------------------------------------------------------------------------------------------------------------------------------------------------------------------------------------------------------------------------------------------------------------------------------------------------------------------------------------------------------------------------------------------------------------------------------------------------------------------------------------------------------------------------------------------------------------------------------------------------------------------------------------------------------------------------------------------------------------------------------------------------------------------------------------------------------------------------------------------------------------------------------------------------------------------------------------------------------------------------------------------------------------------------------------------------------------------------------------------------------------------------------------------------------------------------------------------------------------------------------------------------------------------------------------------------------------------------------------------------------------------------------------------------------------------------------------------------------------------------------------------------------------------------------------------------------|
| Intron 9-10            | 7,893  | gtaagaagatatttgttgcttttct.....agagaccctcattgtctgcacacag                                                                                                                                                                                                                                                                                                                                                                                                                                                                                                                                                                                                                                                                                                                                                                                                                                                                                                                                                                                                                                                                                                                                                                                                                                                                                                                                                                                                                                                                                                                                                                                                                                                                                                                                                                                                                                                                                                                                                                                                                                                                                                                                                                                                                                                                                                                                                                                                                                                                                                                                                                                                                                                                                                                                                                                                                                                                                                                                                                                                                                                                                                                                                                                                                                                                                                                                                                                                                                                                                                                                                                                                                                                                                                                                                                                                                                                                                                                                              |
| <b>Exon 10</b>         | 3,535  | <p>GTCAGGGCCCTTTGAAGTACGAGCAGACCTTGAGGAGTCCATGGAATTTGTGGATCCCGG<br/> AGTTGCTGGAGAATCAGATGAGAGCGGAGATGAGCGCGTCAGCGATGAAGAAACCGACCT<br/> GGGCACAGACTGGGAGAACTTGCTAGTCCCGGTTTTGTGATATCCCTTCCCAGTCTGT<br/> GGAAGTCTCCAGAGTCAGAGCACCCAGGCGTCCCCACCCATCGCGAGCAGCAGTGCAGG<br/> TGGGATGATCTCCTCTGCAGCAGCCTCGGTGACCTCCTGGTTAAAGCTTACACTGGACA<br/> CCGTTAACGAGCATGGACAAAAACATAACCAATCTGCATCAAGAAAAGTTCTTCTCCCACT<br/> ACACTCTAGTAAACATTTTCTGTTTAAAGTTAAGATAGTGTCTGGAACAAAGAGGTTAAAG<br/> TGTGTTTTTGTCTTTTTAAGCAGGGAGACAAAATTTCTATTTGCCAAGTGGCCT<br/> GTGATGGTGACCAACATGCTTATGATAATTAAGAGAACAGGGGTGCAAGGTCTTTCTACC<br/> CAGACCAGTCTGGTGAAGGAGGACCTGTGCGTGTGGCCAGTTCTGCCAAGGAAGCAGT<br/> TGATTTGGGTCCCTCTGGGCCCGGGCCACCGGGCCACAGATATGGGTGAGTGTCTGG<br/> TCCTTGGCGTCTGAGACTGTTCTGACACTTTAAGTTTTAGAGGTTGGTTGAATCACAA<br/> GAGGTGATCTTGATTATTAGGACATGAAAGATAAAAGCTCTTTAATAAGAGTTTTTCTG<br/> CCATTGTTTTTGTATGAGAACCAGCAGGCAATTTAAAATTTCTAATTTGGTCCCTTTGAT<br/> TTTTGTTGGGAGGGGTGAGTTACACGTATTTTATTCATGCTGCTCTGTCGTAGTTTGTCA<br/> GACATTCCTGTTTTCTTTCCCCCACACACCAAGAAAATGAAAGTCTTTTTCTTTAGGA<br/> CCCACATCCATAAATGGAAGAAATCCTGGCTGCAATAATGTCTAGAGAGTTTTTAACTAT<br/> TTTCTTGTATCTGAGGGGAATTAAGCTTATCTTACCTAGTTGAATTCCTGCCATCCAC<br/> ACTATGAGCATTTTGAATTTGAAGTTATATTTTCTGGGTGAAAATAAGTCATGAAGGTCA<br/> TTCCCTTATGTAAGCTCAATGCCTGCCTGGGCACAGGGGAAAAGCCACTTAGTTAAGTGG<br/> CCTCTGGTCATTCTTGTGGTGTCCACTTTCTTTCTATGGGATTGAGTAGGTGGCAGGTGT<br/> TTTCAGGGGAAACCATCTACTTGTTCCTCCCGAACTCTTTGTTGCTCTGAGGACACAGCT<br/> TTGCTCAGAAATGCAGCGCAGATCCTTACGGCTGATGCTACTCTGCTCTGTTCTGGGGAA<br/> AGCACAAATAAAGAAAGAATTTCCAGCCAGGCGAGTGCTCACGCCTACCCAGTAAATCCCAG<br/> CACTTTAGGAGCCGAGGCAGGCGGATCACTTGAGGTCAGGAGTTTGAAGCAGCCTGGC<br/> TAACATGGTGAAACCTGTTTCTACTAAAAATACAAAAAATACCAGGTTGGTGGCGCA<br/> CGCCTGTAATCCAGCTACTCGGGAGGCTGCGGCAGGAGAATCGCTTGAACCGGGAGGCA<br/> GAGGTTGCAGTGAGCCGAGATTGTGCCATGCACTCCAGCCTGGGCAACAAGAGCGAAAC<br/> TCCGTCACAAAAAAGAAATTTCCCTCAGCAGGAGATCATTTTTCAGCTCACGTGTCT<br/> TGTCATTCCTTTAGTGACAATCTTACAAGAAACTATAATGAGAGAGGCATTATGTACAA<br/> ATATGTAAGTAGTTTATTTTTAATAACTGCAAAAAATCCTATGTAACAACCTACCAAAAG<br/> AAATCCATGAAAGAGTCCTAACAGGCATTTATACCATATCTTATGTGATGGCATGATA<br/> GCACCTCTGATAAATCATTACAGAGTTTGGCATGCCAGCTCTTTTTCTCATCATAATA<br/> ATTGTAGTTGATACTTTGCCTCCAAGTCCGAGGTGCTATATAGCTTTTGGTAAATGGTATA<br/> TTTTGGTGTTTGTATAGTTTTTGGGTAGAGTTGCAGAACGGAGTTTTATTTCTATCCGGTAG<br/> TCACAAATTCCTTGGCTCTATGAATTTTCCATGAAAGGAGGAAGTAGGCTTTTCTCGTTG<br/> TGGGTGGTCTTTTTTTTTTTTGGAGACGGAGTCTCACTCAGCTGCCAGGCTGGAGTGTA<br/> GTGGCACCATCTCCGCTCACTGCAACCACCATCTCCTGGGTTCAAGCAATTCCTCCATCT<br/> CAACCTCCCAGTAGCTGGGATTATAGGCACCTGCCATCATGCCAGCTAATTTTTGTAT<br/> TTTAGTAAAGACGGGGTTTTTACCATGTTGGCCAGGCTGGTCTTGAAGTCTGACTTCA<br/> GGTGATCCGCTTGCCTTGGCCTCCTAAAGTGTAGGATTACAGGCCTGAGCCACCGCGCC<br/> CGGCCCCTTATGGGTTCTTCTACACTGCTGGGATCTCTGTTTTAAGTGTCTCAGCTTCATG<br/> ATTGATTGCTGGGCTTCCATTTTCCCAGTCTGAGGTTTCGTAGAGAGTGAAGATGG<br/> TAGACTTGAACAGATAAATAAACTTAACGATCTTGTAAAGAGTTGTCTAGCTACTTAAAC<br/> CCTCAGAAGTAAAGACTTAGTCTCACGAGTTGTAAGAGTGGGATTTGGAGCTTGGTGGTG<br/> GAGACTGACTTCACTGAGAGATGCACAACAGTCATGGTTTTCTTAAAGCCTCTTATGAAA<br/> CCATGAATGAGAGATGAAGCTAAAGAATAGAATCCAGAGATCACAACTCATCTAGAGTA<br/> CTTCCACAAAATTTACAAGATGTGGGAACTTTATGGATAGGATATATTTTTGTTTGTGT<br/> TGTTAATATCAACTAGAGGCACTTTACATAGGGTTAAGTGTGCAACCTTTTTGTGGTTT<br/> TGAACCCAACATACTGGCTTACACTGCTGAAATATTTTGGGTTTCATTATTTTGCCTG<br/> GATCCACCCTGTAATACTCTTAAAGTATACATTTCAACCATGTTTTTTTCTACTCTTTTT<br/> GCTGCTCATTAATACTTTTCTAGTGTAGGTGCCAGAACCATATGTAACAGCTTTTTAAAAA<br/> ATTGAAGCTGGTATTTTTGTTTTAAACAAAAAGCCATAGAAGTGGTCACTTTTTCCATTTT<br/> AAAATGATTTACTGAAACAAAGTAATACTAATAAAAAACCCACAGGCACCAAAACAGGCTGC<br/> TTAAAATGGTCTGTAAAGACATTTTTTGGTTATGGAATATAAGAAAAGTTTTGCACATC<br/> TGTAAGGGGGAAAAACAGTATATCACCATTGGGTAGAGTGGACGGGACTCATGTAAGGAC<br/> TCAATTTGGGGAAGAGCATTCAGTGGCATGCTGTTAGAGGACTAGTGTCCGAGAATCTCC<br/> TCACAGTATCATGTTGCAGGAATTCCTTCTGCAACTTCAAACAGTTTTGAGTC<br/> ATACAAATGTTTTCTAAACTTTTTATTGATTTACTGCAATAAATCTTTTAAACAGTA</p> |
| 3' downstream sequence |        | ctttgctcatgtgatgtctttttcctaactgttccatttgcactgctgcat.....                                                                                                                                                                                                                                                                                                                                                                                                                                                                                                                                                                                                                                                                                                                                                                                                                                                                                                                                                                                                                                                                                                                                                                                                                                                                                                                                                                                                                                                                                                                                                                                                                                                                                                                                                                                                                                                                                                                                                                                                                                                                                                                                                                                                                                                                                                                                                                                                                                                                                                                                                                                                                                                                                                                                                                                                                                                                                                                                                                                                                                                                                                                                                                                                                                                                                                                                                                                                                                                                                                                                                                                                                                                                                                                                                                                                                                                                                                                                             |
